# Supplementary material for: Monitoring of asparagine depletion and anti-l-asparaginase antibodies in adult acute lymphoblastic leukemia treated in the pediatric-inspired GRAALL-2005 trial
Source: PubMed Central journal article supplement (PMC5966449; doi:10.1038/s41408-018-0084-5), 2018-05-22
Supplement: 41408_2018_84_MOESM1_ESM.pdf [file 41408_2018_84_MOESM1_ESM.pdf]

Supplemental figure: patient characteristics, outcomes, asparagine depletion and anti-asparaginase Abs evaluation.

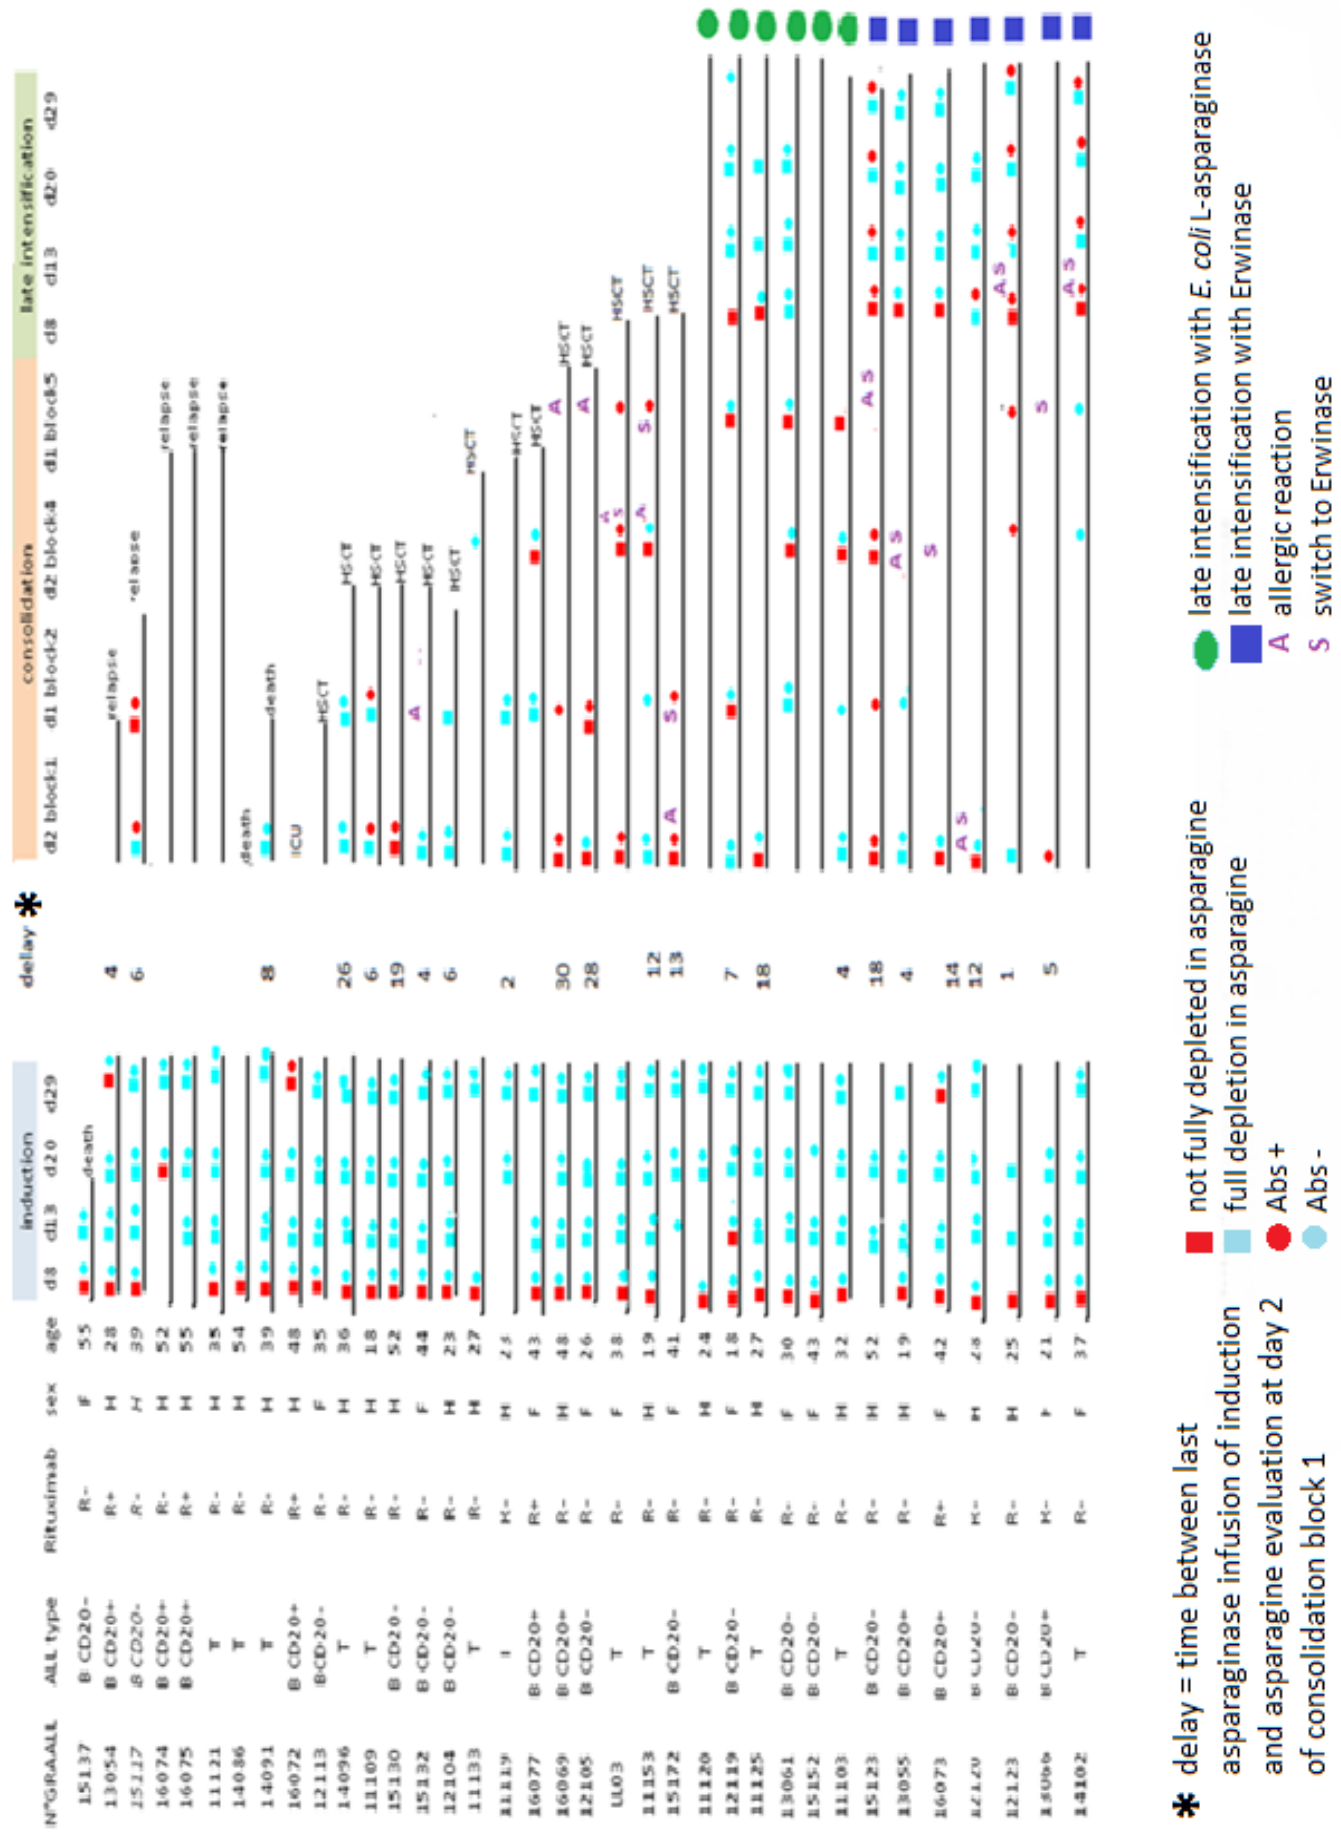

HSCT allogeneic stem cell transplantation
